# Supplementary material for: Role of Dietary Defatted Rice Bran in the Modulation of Gut Microbiota in AOM/DSS-Induced Colitis-Associated Colorectal Cancer Rat Model
Source: MDPI journal article supplement (doi:10.3390/nu15061528), 2023-03-22
Supplement: s1 [file s1]

**Table S1.** Effect of defatted rice bran on body weight change (%) (mean  $\pm$  S.E.M.).

| Week | Experimental group |                    |                    |                     |                               |                               |
|------|--------------------|--------------------|--------------------|---------------------|-------------------------------|-------------------------------|
|      | Control<br>(n=10)  | DRBL<br>(n=10)     | DRBH<br>(n=10)     | Induction<br>(n=12) | Induction +<br>DRBL<br>(n=12) | Induction +<br>DRBH<br>(n=12) |
| 1    | 65.31 $\pm$ 5.68   | 65.98 $\pm$ 3.75   | 65.16 $\pm$ 4.76   | 69.61 $\pm$ 3.97    | 67.81 $\pm$ 3.66              | 69.79 $\pm$ 4.48              |
| 2    | 115.88 $\pm$ 7.79  | 114.61 $\pm$ 5.51  | 112.09 $\pm$ 6.49  | 119.99 $\pm$ 5.00   | 117.48 $\pm$ 5.25             | 114.77 $\pm$ 6.00             |
| 3    | 175.37 $\pm$ 10.73 | 169.10 $\pm$ 8.23  | 168.77 $\pm$ 8.72  | 175.92 $\pm$ 5.93   | 171.93 $\pm$ 5.61             | 171.00 $\pm$ 7.35             |
| 4    | 228.62 $\pm$ 13.93 | 222.59 $\pm$ 11.05 | 220.52 $\pm$ 10.94 | 217.61 $\pm$ 7.65   | 214.51 $\pm$ 7.17             | 214.74 $\pm$ 8.53             |
| 5    | 274.13 $\pm$ 16.13 | 279.09 $\pm$ 16.48 | 260.53 $\pm$ 13.45 | 239.63 $\pm$ 8.96   | 242.53 $\pm$ 9.77             | 247.40 $\pm$ 10.16            |
| 6    | 309.73 $\pm$ 18.86 | 296.70 $\pm$ 13.61 | 294.11 $\pm$ 15.30 | 236.49 $\pm$ 11.63* | 245.97 $\pm$ 11.83*           | 256.68 $\pm$ 12.57*           |
| 7    | 338.99 $\pm$ 19.61 | 328.11 $\pm$ 16.72 | 321.93 $\pm$ 17.32 | 295.20 $\pm$ 13.22* | 299.08 $\pm$ 13.24*           | 302.75 $\pm$ 12.59*           |
| 8    | 362.07 $\pm$ 21.62 | 355.31 $\pm$ 16.71 | 349.30 $\pm$ 18.69 | 274.95 $\pm$ 11.85* | 280.11 $\pm$ 17.09*           | 290.18 $\pm$ 11.66*           |
| 9    | 382.62 $\pm$ 23.65 | 376.60 $\pm$ 18.17 | 368.90 $\pm$ 20.08 | 329.39 $\pm$ 15.20  | 329.69 $\pm$ 16.99            | 328.92 $\pm$ 15.19            |
| 10   | 401.59 $\pm$ 24.51 | 396.89 $\pm$ 20.16 | 387.29 $\pm$ 22.17 | 348.36 $\pm$ 14.31  | 352.13 $\pm$ 15.92            | 355.89 $\pm$ 15.13            |
| 11   | 413.06 $\pm$ 25.76 | 411.38 $\pm$ 21.15 | 395.44 $\pm$ 24.62 | 368.98 $\pm$ 16.27  | 371.19 $\pm$ 16.22            | 372.01 $\pm$ 15.54            |
| 12   | 425.31 $\pm$ 25.57 | 423.96 $\pm$ 21.38 | 411.80 $\pm$ 22.16 | 379.68 $\pm$ 14.94  | 383.06 $\pm$ 15.50            | 382.44 $\pm$ 14.80            |
| 13   | 434.13 $\pm$ 26.29 | 435.77 $\pm$ 21.87 | 423.43 $\pm$ 22.03 | 388.10 $\pm$ 16.42  | 390.43 $\pm$ 17.52            | 393.80 $\pm$ 15.61            |

Data from all experimental groups are compared using one-way ANOVA followed by Tukey's HSD post-hoc test. Mean with an asterisk (\*) superscript in each column is significantly different ( $p < 0.05$ ) when compared to the control group.

**Table S2.** Effect of defatted rice bran on food intake (g) (mean  $\pm$  S.E.M.).

| Week | Experimental group |                  |                  |                     |                               |                               |
|------|--------------------|------------------|------------------|---------------------|-------------------------------|-------------------------------|
|      | Control<br>(n=10)  | DRBL<br>(n=10)   | DRBH<br>(n=10)   | Induction<br>(n=12) | Induction +<br>DRBL<br>(n=12) | Induction +<br>DRBH<br>(n=12) |
| 1    | 19.94 $\pm$ 0.25   | 20.86 $\pm$ 0.54 | 20.45 $\pm$ 0.51 | 19.08 $\pm$ 0.46    | 18.97 $\pm$ 0.60              | 19.20 $\pm$ 0.44              |
| 2    | 21.60 $\pm$ 0.63   | 22.34 $\pm$ 0.55 | 21.42 $\pm$ 0.74 | 21.60 $\pm$ 0.43    | 21.22 $\pm$ 0.55              | 20.68 $\pm$ 0.73              |
| 3    | 25.48 $\pm$ 0.32   | 24.92 $\pm$ 0.55 | 24.78 $\pm$ 0.35 | 23.43 $\pm$ 0.36*   | 23.17 $\pm$ 0.25*             | 21.37 $\pm$ 0.94*             |
| 4    | 20.34 $\pm$ 1.64   | 20.50 $\pm$ 1.93 | 21.94 $\pm$ 1.21 | 22.75 $\pm$ 1.31    | 20.53 $\pm$ 1.23              | 20.10 $\pm$ 1.31              |
| 5    | 26.32 $\pm$ 0.48   | 24.90 $\pm$ 0.56 | 22.66 $\pm$ 0.73 | 21.70 $\pm$ 0.58*   | 21.95 $\pm$ 0.50*             | 23.50 $\pm$ 0.83*             |
| 6    | 25.20 $\pm$ 0.70   | 24.90 $\pm$ 0.31 | 23.46 $\pm$ 0.51 | 18.17 $\pm$ 1.08*   | 16.98 $\pm$ 0.52*             | 18.82 $\pm$ 0.50*             |
| 7    | 23.78 $\pm$ 0.79   | 22.74 $\pm$ 0.66 | 20.80 $\pm$ 1.01 | 24.15 $\pm$ 0.66    | 22.95 $\pm$ 0.65              | 21.07 $\pm$ 0.84#             |
| 8    | 22.86 $\pm$ 1.50   | 24.16 $\pm$ 1.09 | 22.14 $\pm$ 0.61 | 18.60 $\pm$ 1.05*   | 14.35 $\pm$ 1.94*             | 14.15 $\pm$ 1.38*             |
| 9    | 26.06 $\pm$ 0.32   | 22.42 $\pm$ 1.27 | 22.00 $\pm$ 0.98 | 25.22 $\pm$ 0.94    | 23.98 $\pm$ 0.65              | 23.75 $\pm$ 0.79              |
| 10   | 24.62 $\pm$ 0.42   | 22.16 $\pm$ 0.69 | 21.42 $\pm$ 0.38 | 23.33 $\pm$ 0.67    | 20.34 $\pm$ 1.09*             | 21.58 $\pm$ 0.75*             |
| 11   | 22.02 $\pm$ 0.84   | 19.48 $\pm$ 0.97 | 21.42 $\pm$ 0.96 | 23.67 $\pm$ 0.59    | 19.90 $\pm$ 1.16#             | 18.75 $\pm$ 0.72#             |
| 12   | 22.78 $\pm$ 0.34   | 21.44 $\pm$ 0.67 | 19.52 $\pm$ 0.72 | 22.83 $\pm$ 0.69    | 20.83 $\pm$ 1.01              | 21.27 $\pm$ 0.77              |
| 13   | 21.24 $\pm$ 0.80   | 21.26 $\pm$ 0.77 | 20.52 $\pm$ 0.65 | 20.93 $\pm$ 0.84    | 18.58 $\pm$ 0.76*#            | 16.67 $\pm$ 0.83*#            |

Data from all experimental groups are compared using one-way ANOVA followed by Tukey's HSD post-hoc test. Mean with an asterisk (\*) and number signs (#) superscript in each column is significantly different ( $p < 0.05$ ) when compared to the control and induction groups, respectively.

**Table S3.** Effect of defatted rice bran on colon weight (g), length (cm), and relative colonic weight/length ratio (g/cm) in experimental group (mean  $\pm$  S.E.M.).

| Parameters                                   | Experimental group |                   |                   |                     |                               |                               |
|----------------------------------------------|--------------------|-------------------|-------------------|---------------------|-------------------------------|-------------------------------|
|                                              | Control<br>(n=10)  | DRBL<br>(n=10)    | DRBH<br>(n=10)    | Induction<br>(n=12) | Induction +<br>DRBL<br>(n=12) | Induction +<br>DRBH<br>(n=12) |
| Colon weight (g)                             | 1.33 $\pm$ 0.17    | 1.33 $\pm$ 0.11   | 1.34 $\pm$ 0.18   | 1.40 $\pm$ 0.18     | 1.32 $\pm$ 0.23               | 1.35 $\pm$ 0.24               |
| Colon length (cm)                            | 20.45 $\pm$ 1.44   | 21.27 $\pm$ 2.31  | 20.57 $\pm$ 2.28  | 17.89 $\pm$ 1.07    | 18.39 $\pm$ 1.13              | 18.70 $\pm$ 2.17              |
| Relative colon weight/length<br>ratio (g/cm) | 0.065 $\pm$ 0.007  | 0.063 $\pm$ 0.008 | 0.066 $\pm$ 0.008 | 0.078 $\pm$ 0.007*  | 0.070 $\pm$ 0.010             | 0.072 $\pm$ 0.009             |

Data from all experimental groups are compared using one-way ANOVA followed by Tukey's HSD post-hoc test. Mean with an asterisk (\*) superscript in each column is significantly different ( $p < 0.05$ ) when compared to the control group.

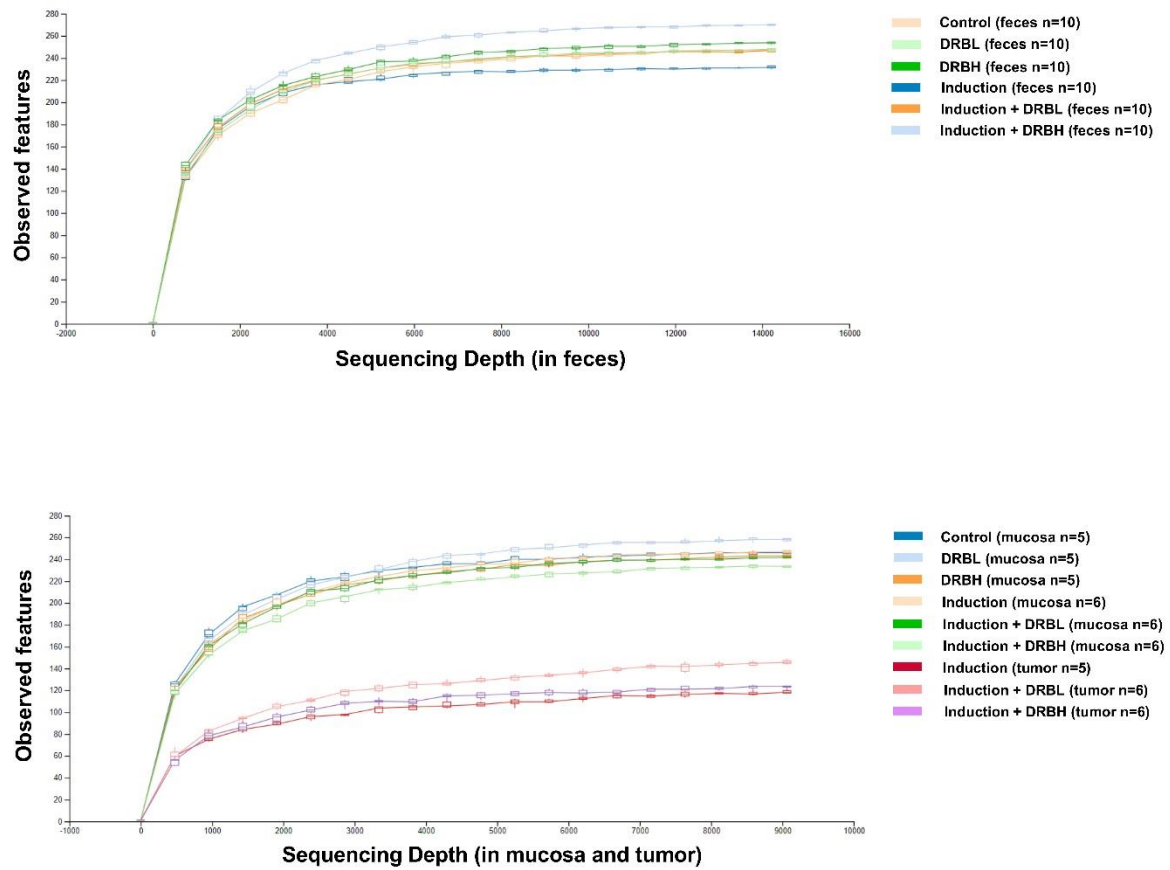

**Figure S1.** The rare fraction curves of alpha diversity in colonic feces, mucosa, and tumors.

**Table S4.** Comparison of relative abundance (%) of bacterial phylum in feces.

| Phylum                 | Experimental group (in feces) |                |                |                     |                               |                               |
|------------------------|-------------------------------|----------------|----------------|---------------------|-------------------------------|-------------------------------|
|                        | Control<br>(n=10)             | DRBL<br>(n=10) | DRBH<br>(n=10) | Induction<br>(n=12) | Induction +<br>DRBL<br>(n=12) | Induction +<br>DRBH<br>(n=12) |
| <i>Firmicutes</i>      | 58.76                         | 69.27          | 64.78          | 63.08               | 68.66                         | 63.66                         |
| <i>Verrucomicrobia</i> | 23.02                         | 17.76          | 14.48          | 20.25               | 16.29                         | 19.87                         |
| <i>Bacteroidetes</i>   | 15.75                         | 11.15          | 18.59          | 14.58               | 13.06                         | 14.40                         |
| <i>Actinobacteria</i>  | 1.84                          | 1.42           | 1.50           | 1.43                | 1.54                          | 1.46                          |
| <i>Proteobacteria</i>  | 0.48                          | 0.29           | 0.53           | 0.52                | 0.28                          | 0.44                          |
| <i>Patescibacteria</i> | 0.15                          | 0.11           | 0.12           | 0.13                | 0.17                          | 0.17                          |

**Table S5.** Comparison of relative abundance (%) of bacterial family in feces.

| Family                                       | Experimental group (in feces) |                |                |                     |                               |                               |
|----------------------------------------------|-------------------------------|----------------|----------------|---------------------|-------------------------------|-------------------------------|
|                                              | Control<br>(n=10)             | DRBL<br>(n=10) | DRBH<br>(n=10) | Induction<br>(n=12) | Induction +<br>DRBL<br>(n=12) | Induction +<br>DRBH<br>(n=12) |
| <i>Lachnospiraceae</i>                       | 18.66                         | 23.54          | 24.95          | 21.19               | 25.24                         | 23.09                         |
| <i>Akkermansiaceae</i>                       | 23.02                         | 17.76          | 14.48          | 20.25               | 16.29                         | 19.87                         |
| <i>Peptostreptococcaceae</i>                 | 10.66                         | 15.85          | 10.42          | 12.69               | 12.10                         | 11.94                         |
| <i>Lactobacillaceae</i>                      | 10.05                         | 8.32           | 8.39           | 6.99                | 9.09                          | 8.86                          |
| <i>Muribaculaceae</i>                        | 10.23                         | 6.94           | 10.21          | 8.94                | 7.41                          | 7.70                          |
| <i>Oscillospiraceae</i>                      | 2.93                          | 4.20           | 5.74           | 4.48                | 5.13                          | 4.74                          |
| <i>Erysipelotrichaceae</i>                   | 4.10                          | 4.30           | 3.10           | 5.02                | 4.26                          | 3.35                          |
| <i>Ruminococcaceae</i>                       | 4.43                          | 4.30           | 5.14           | 2.96                | 3.77                          | 3.66                          |
| <i>Prevotellaceae</i>                        | 3.04                          | 2.48           | 5.38           | 3.21                | 3.71                          | 4.67                          |
| <i>Clostridiaceae</i>                        | 2.46                          | 2.98           | 0.98           | 4.02                | 3.15                          | 2.19                          |
| <i>[Eubacterium] coprostanoligenes group</i> | 1.93                          | 2.02           | 2.16           | 1.92                | 2.29                          | 2.30                          |
| <i>Eggerthellaceae</i>                       | 1.66                          | 1.33           | 1.41           | 1.29                | 1.45                          | 1.38                          |
| <i>Bacteroidaceae</i>                        | 1.41                          | 0.97           | 1.76           | 1.38                | 1.15                          | 1.25                          |
| <i>Rikenellaceae</i>                         | 1.07                          | 0.75           | 1.24           | 1.05                | 0.78                          | 0.78                          |

**Table S6.** Comparison of relative abundance (%) of bacterial genus in feces.

| Genus                              | Experimental group (in feces) |                |                |                     |                               |                               |
|------------------------------------|-------------------------------|----------------|----------------|---------------------|-------------------------------|-------------------------------|
|                                    | Control<br>(n=10)             | DRBL<br>(n=10) | DRBH<br>(n=10) | Induction<br>(n=12) | Induction +<br>DRBL<br>(n=12) | Induction +<br>DRBH<br>(n=12) |
| <i>Akkermansia</i>                 | 23.019                        | 17.760         | 14.479         | 20.254              | 16.295                        | 19.873                        |
| <i>Lactobacillus</i>               | 10.053                        | 8.317          | 8.394          | 6.986               | 9.092                         | 8.858                         |
| <i>Alloprevotella</i>              | 2.402                         | 1.688          | 3.749          | 2.601               | 2.779                         | 3.045                         |
| <i>Prevotellaceae</i> UCG-001      | 0.636                         | 0.795          | 1.626          | 0.610               | 0.928                         | 1.624                         |
| <i>Ruminococcus</i>                | 0.814                         | 0.731          | 1.305          | 0.523               | 0.825                         | 0.983                         |
| <i>Ruminococcaceae</i>             | 0.034                         | 0.146          | 0.129          | 0.020               | 0.075                         | 0.142                         |
| <i>Butyricicoccus</i>              | 0.018                         | 0.018          | 0.034          | 0.019               | 0.033                         | 0.028                         |
| <i>Roseburia</i>                   | 0.013                         | 0.037          | 0.058          | 0.055               | 0.043                         | 0.053                         |
| <i>Turicibacter</i>                | 3.498                         | 3.737          | 2.982          | 4.061               | 4.078                         | 3.116                         |
| <i>Clostridium sensu stricto</i> 1 | 2.458                         | 2.977          | 0.984          | 4.016               | 3.146                         | 2.185                         |
| <i>Enterococcus</i>                | 0.044                         | 0.105          | 0.085          | 0.291               | 0.182                         | 0.264                         |
| <i>Escherichia-Shigella</i>        | 0.021                         | 0.024          | 0.014          | 0.238               | 0.056                         | 0.148                         |
| <i>Citrobacter</i>                 | 0.000                         | 0.000          | 0.000          | 0.014               | 0.007                         | 0.009                         |

**Table S7.** Comparison of relative abundance (%) of bacterial phylum in colonic mucosa and tumor.

| Phylum                 | Experimental group (in mucosa) |               |               |                    |                              |                              | Experimental group (in tumor) |                              |                              |
|------------------------|--------------------------------|---------------|---------------|--------------------|------------------------------|------------------------------|-------------------------------|------------------------------|------------------------------|
|                        | Control<br>(n=5)               | DRBL<br>(n=5) | DRBH<br>(n=5) | Induction<br>(n=6) | Induction<br>+ DRBL<br>(n=6) | Induction<br>+ DRBH<br>(n=6) | Induction<br>(n=5)            | Induction<br>+ DRBL<br>(n=6) | Induction<br>+ DRBH<br>(n=6) |
| <i>Firmicutes</i>      | 55.45                          | 57.91         | 51.56         | 54.50              | 56.88                        | 55.63                        | 48.77                         | 66.90                        | 52.99                        |
| <i>Bacteroidetes</i>   | 24.64                          | 18.38         | 27.95         | 17.74              | 22.60                        | 22.96                        | 6.89                          | 8.17                         | 6.52                         |
| <i>Verrucomicrobia</i> | 11.32                          | 18.90         | 11.86         | 11.05              | 9.03                         | 12.86                        | 5.48                          | 4.23                         | 5.98                         |
| <i>Proteobacteria</i>  | 5.49                           | 2.82          | 6.13          | 15.48              | 9.36                         | 6.50                         | 37.31                         | 19.68                        | 31.56                        |
| <i>Actinobacteria</i>  | 2.99                           | 1.87          | 2.29          | 1.17               | 1.98                         | 1.97                         | 1.37                          | 0.93                         | 2.94                         |
| <i>Patescibacteria</i> | 0.06                           | 0.11          | 0.11          | 0.06               | 0.13                         | 0.07                         | 0.02                          | 0.08                         | 0.01                         |



**Table S8.** Comparison of relative abundance (%) of bacterial family in colonic mucosa and tumor.

| Family                               | Experimental group (in mucosa) |               |               |                    |                              |                              | Experimental group (in tumor) |                              |                              |
|--------------------------------------|--------------------------------|---------------|---------------|--------------------|------------------------------|------------------------------|-------------------------------|------------------------------|------------------------------|
|                                      | Control<br>(n=5)               | DRBL<br>(n=5) | DRBH<br>(n=5) | Induction<br>(n=6) | Induction<br>+ DRBL<br>(n=6) | Induction<br>+ DRBH<br>(n=6) | Induction<br>(n=5)            | Induction<br>+ DRBL<br>(n=6) | Induction<br>+ DRBH<br>(n=6) |
| <i>Lachnospiraceae</i>               | 17.97                          | 18.47         | 18.29         | 17.53              | 14.07                        | 17.55                        | 5.76                          | 6.74                         | 4.40                         |
| <i>Muribaculaceae</i>                | 15.37                          | 11.13         | 15.85         | 10.06              | 13.15                        | 11.87                        | 4.07                          | 4.07                         | 2.57                         |
| <i>Ruminococcaceae</i>               | 14.67                          | 15.81         | 16.86         | 12.06              | 12.49                        | 14.76                        | 5.85                          | 6.52                         | 6.21                         |
| <i>Akkermansiaceae</i>               | 11.32                          | 18.90         | 11.86         | 11.05              | 9.03                         | 12.86                        | 5.48                          | 4.23                         | 5.98                         |
| <i>Lactobacillaceae</i>              | 9.33                           | 7.33          | 6.11          | 5.07               | 8.47                         | 7.19                         | 18.32                         | 27.92                        | 7.24                         |
| <i>Prevotellaceae</i>                | 6.71                           | 4.92          | 8.18          | 3.91               | 5.85                         | 6.82                         | 1.76                          | 2.01                         | 1.94                         |
| <i>Peptostreptococcaceae</i>         | 6.21                           | 7.89          | 5.38          | 6.96               | 7.67                         | 4.69                         | 2.72                          | 3.50                         | 1.19                         |
| <i>Erysipelotrichaceae</i>           | 3.54                           | 3.08          | 1.71          | 2.88               | 3.36                         | 2.11                         | 1.22                          | 1.62                         | 0.55                         |
| <i>Caulobacteraceae</i>              | 2.94                           | 1.45          | 4.40          | 1.84               | 0.19                         | 0.27                         | 10.20                         | 6.29                         | 3.83                         |
| <i>Eggerthellaceae</i>               | 2.64                           | 1.64          | 1.95          | 1.04               | 1.80                         | 1.81                         | 0.94                          | 0.56                         | 2.71                         |
| <i>Clostridiaceae 1</i>              | 1.62                           | 2.44          | 0.53          | 2.02               | 1.40                         | 1.04                         | 0.44                          | 0.78                         | 0.30                         |
| <i>Bacteroidaceae</i>                | 1.59                           | 1.26          | 2.18          | 2.76               | 2.52                         | 3.34                         | 0.61                          | 1.40                         | 1.78                         |
| <i>Burkholderiaceae</i>              | 1.46                           | 0.76          | 0.91          | 0.47               | 0.39                         | 0.59                         | 0.18                          | 0.20                         | 0.03                         |
| <i>Rikenellaceae</i>                 | 0.95                           | 1.02          | 1.58          | 0.97               | 1.08                         | 0.88                         | 0.36                          | 0.68                         | 0.21                         |
| <i>Clostridiales vadinBB60 group</i> | 0.71                           | 1.17          | 1.01          | 1.19               | 1.38                         | 1.11                         | 0.72                          | 0.66                         | 0.33                         |

**Table S9.** Comparison of relative abundance (%) of bacterial genus in colonic mucosa and tumor.

| Genus                              | Experimental group (in mucosa) |               |               |                    |                              |                              | Experimental group (in tumor) |                              |                              |
|------------------------------------|--------------------------------|---------------|---------------|--------------------|------------------------------|------------------------------|-------------------------------|------------------------------|------------------------------|
|                                    | Control<br>(n=5)               | DRBL<br>(n=5) | DRBH<br>(n=5) | Induction<br>(n=6) | Induction<br>+ DRBL<br>(n=6) | Induction<br>+ DRBH<br>(n=6) | Induction<br>(n=5)            | Induction<br>+ DRBL<br>(n=6) | Induction<br>+ DRBH<br>(n=6) |
| <i>Lactobacillus</i>               | 9.327                          | 7.328         | 6.108         | 5.066              | 8.471                        | 7.186                        | 18.322                        | 27.916                       | 20.237                       |
| <i>Akkermansia</i>                 | 11.324                         | 18.899        | 11.856        | 11.051             | 9.034                        | 12.860                       | 5.480                         | 4.227                        | 5.977                        |
| <i>Alloprevotella</i>              | 5.613                          | 3.517         | 5.761         | 3.256              | 4.192                        | 4.141                        | 1.289                         | 1.410                        | 0.929                        |
| <i>Prevotellaceae UCG-001</i>      | 1.015                          | 1.364         | 2.319         | 0.634              | 1.649                        | 2.670                        | 0.272                         | 0.524                        | 0.982                        |
| <i>Ruminococcus</i>                | 0.373                          | 0.554         | 0.741         | 0.362              | 0.502                        | 0.688                        | 0.235                         | 0.259                        | 0.172                        |
| <i>Roseburia</i>                   | 0.232                          | 0.801         | 1.070         | 0.557              | 0.171                        | 0.506                        | 0.175                         | 0.195                        | 0.132                        |
| <i>Butyricicoccus</i>              | 0.159                          | 0.088         | 0.190         | 0.077              | 0.118                        | 0.123                        | 0.158                         | 0.050                        | 0.040                        |
| <i>Enterococcus</i>                | 0.104                          | 0.203         | 0.057         | 5.472              | 6.883                        | 6.164                        | 12.693                        | 18.583                       | 24.232                       |
| <i>Escherichia-Shigella</i>        | 0.062                          | 0.038         | 0.128         | 6.502              | 3.953                        | 3.407                        | 12.531                        | 8.409                        | 6.121                        |
| <i>Citrobacter</i>                 | 0.013                          | 0.013         | 0.000         | 4.358              | 3.280                        | 1.274                        | 12.892                        | 2.754                        | 9.598                        |
| <i>Clostridium sensu stricto 1</i> | 1.562                          | 2.445         | 0.525         | 2.001              | 1.399                        | 1.039                        | 0.430                         | 0.719                        | 0.296                        |
| <i>Mycobacterium</i>               | 0.000                          | 0.000         | 0.000         | 0.004              | 0.000                        | 0.000                        | 0.055                         | 0.037                        | 0.031                        |
